# Supplementary material for: Gut microbiota can utilize prebiotic birch glucuronoxylan in production of short-chain fatty acids in rats
Source: Royal Society of Chemistry journal article supplement (doi:10.1039/d1fo03922a), 2022-01-01
Supplement: d1fo03922a1.pdf [file d1fo03922a1.pdf]

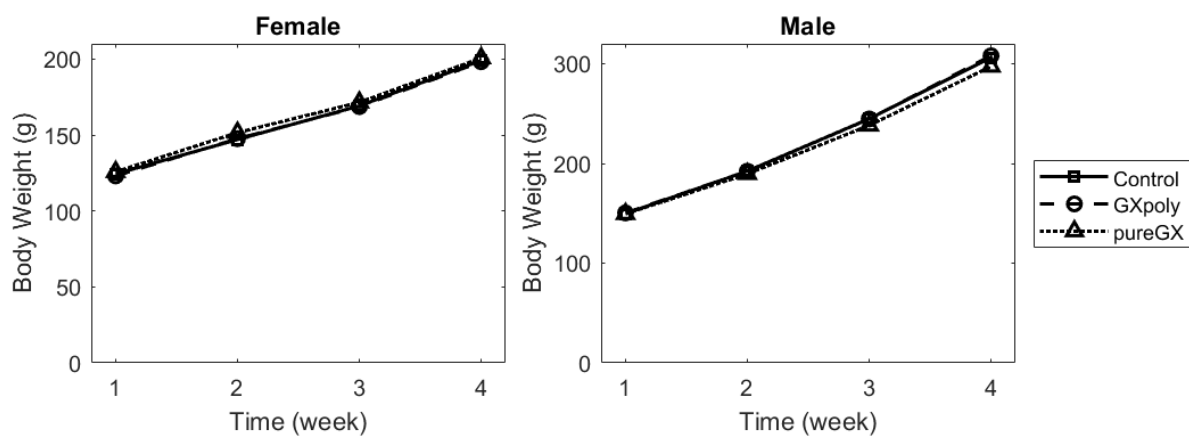

**Figure S1.** Growth curve of female and male Wistar rats fed cellulose (Control), polyphenol-and GX-rich extract (GXpoly), or highly purified GX (pureGX) for 4 weeks. There was no difference due to sex between the groups.
