# Supplementary material for: Gut microbiota can utilize prebiotic birch glucuronoxylan in production of short-chain fatty acids in rats
Source: Royal Society of Chemistry journal article supplement (doi:10.1039/d1fo03922a), 2022-01-01
Supplement: d1fo03922a2.pdf [file d1fo03922a2.pdf]

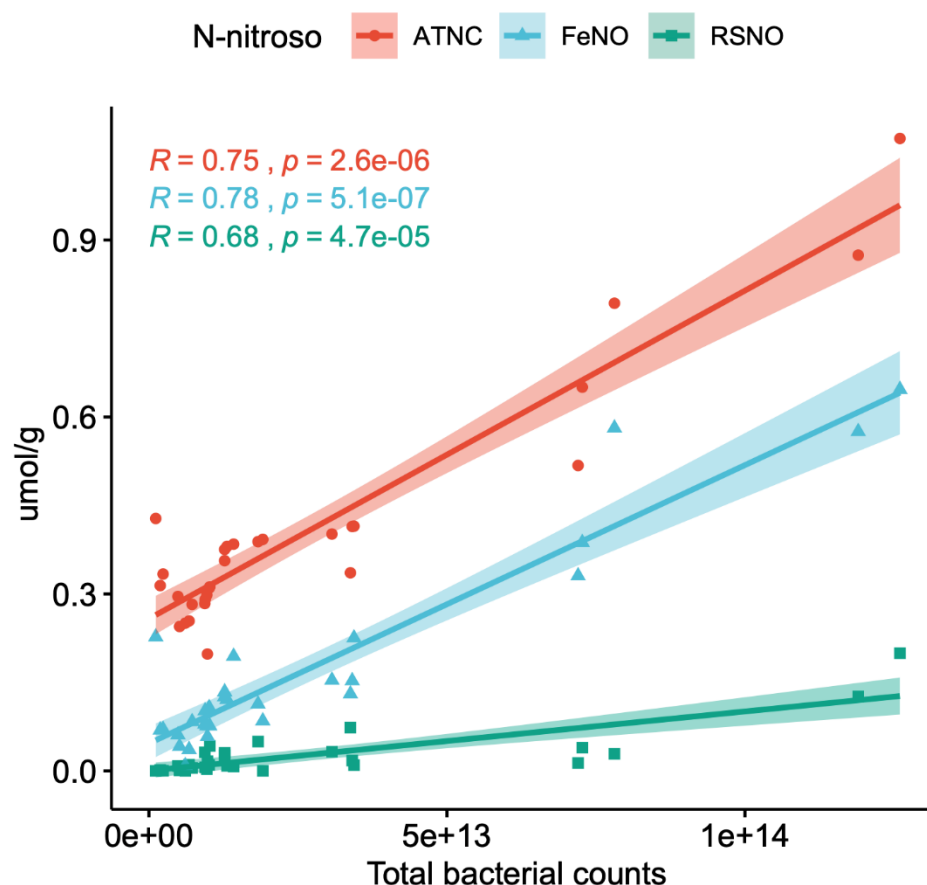

**Figure S2.** Spearman's correlations between the concentrations of N-nitroso compounds (umol/g of wet feces) and total bacterial counts (copy numbers/g of wet feces) in all available samples (N=35). Spearman's rank correlation coefficients (R) display at the upper left corner. The shaded area represents the 95% confidence intervals. ATNC, apparent total N-nitroso compounds; FeNO, nitrosyl iron; RSNO, nitroso thiols.
