# Supplementary material for: Gut microbiota can utilize prebiotic birch glucuronoxylan in production of short-chain fatty acids in rats
Source: Royal Society of Chemistry journal article supplement (doi:10.1039/d1fo03922a), 2022-01-01
Supplement: d1fo03922a3.pdf [file d1fo03922a3.pdf]

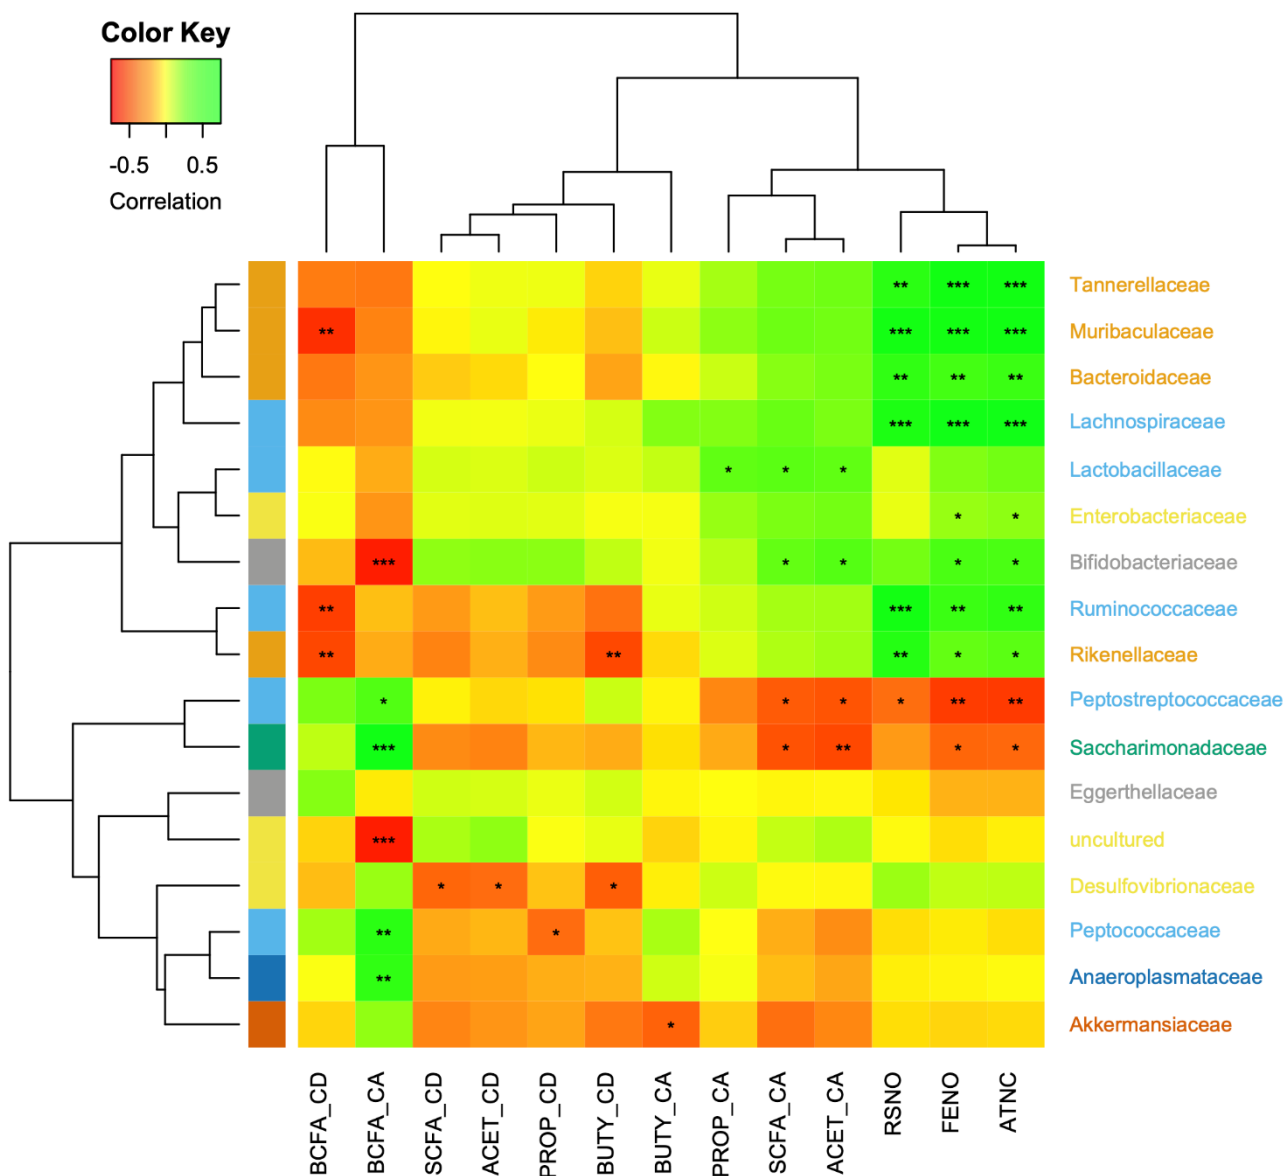

**Figure S3.** Correlation heatmaps for Spearman's correlations between the absolute abundances of bacterial families and the colonic and cecal concentrations of measured metabolites. For readability of the figures, only prevalent bacterial families (present in > 30% of samples) are shown. \* FDR-P < 0.05; \*\* FDR-P < 0.01; \*\*\* FDR-P < 0.001. BCFA, branched-chain fatty acid; SCFA, short-chain fatty acid; ACET, acetate; PROP, propionate; RSNO, nitrosothiols; FENO, nitrosyl iron compounds; ATNC, apparent total N-nitroso compounds. \_CD represents measurements from the distal colon; \_CA represents measurements from the cecum.
