# Supplementary material for: Gut microbiota can utilize prebiotic birch glucuronoxylan in production of short-chain fatty acids in rats
Source: Royal Society of Chemistry journal article supplement (doi:10.1039/d1fo03922a), 2022-01-01
Supplement: d1fo03922a4.xlsx [file d1fo03922a4.xlsx]

## Sheet: Table S1.
	Table S1. Carbohydrate composition and extractives of GXpoly and pureGX39
	Extract	GXpoly	pureGX
	Carbohydrate (mg/g)
	β-D-xylopyranosyl	468.8	612.2
	4-O-methyl-α-D-glucopyranosyl uronic acid	36.2	57.0
	α-D(1→6)-galactopyranosyl	12.7	31.9
	β-D(1→4)-mannopyranosyl	22.6	22.3
	β-D(1→4)-glucopyranosyl	14.5	18.1
	Rhamnosis	8.8	15.4
	Galactouronic acid	13.6	14.6
	Arabinose	0.8	4.2
	Glucuronic acid	N.D.	1.0
	Extractive (mg/g)
	Dioic acids (C5–C10)	0.06	N.D.
	Fatty acids (C14–C22	0.2	0.04
	Resin acids	0.01	0.03
	Oxidized resin acids	0.03	0.005
	Simple phenolics	2.4	0.008
	Lignans (identified)	4.2	0.03
	Unknown lignans3	3.4	0.04
	Total extractives	10.5	0.17
	1 Glucuronoxylan- and polyphenol-rich hemicellulose extract
	2 Highly purified glucuronoxylan-rich hemicellulose extract
	3 Based on unidentified peaks in the same retention time region as identified lignans

## Sheet: Table S2. 
	Table S2. Relative abundance of bacteria in cecal samples of Wistar rats fed either the GXpoly or pureGX diet when compared to the control diet (cellulose)
			Relative abundance								Absolute abundance
			FoldChange_GXpoly		FoldChange_pureGX		GXpoly_FDR.p		pureGX_FDR.p		FoldChange_GXpoly		FoldChange_pureGX		GXpoly_FDR.p		pureGX_FDR.p
	Family
	Actinobacteria_Actinobacteria_Bifidobacteriales_Bifidobacteriaceae		150.876		432.575		5.04244e-23		1.99534e-39		3.01762e+07		2.62181e+08		1.37317e-05		1.15855e-06
	Actinobacteria_Coriobacteriia_Coriobacteriales_Atopobiaceae		5.36957		2.759		7.3205e-06		0.00848952		65593.1		7747.95		0.0101623		0.0288868
	Actinobacteria_Coriobacteriia_Coriobacteriales_Eggerthellaceae		4.14737		1.05232		0.000788553		0.788702		21442.2		0.018137		0.00281503		0.40577
	Bacteroidetes_Bacteroidia_Bacteroidales_Bacteroidaceae		1.71873		0.73398		0.155289		0.441623		4.98265		5.29609		0.0438775		0.0266381
	Bacteroidetes_Bacteroidia_Bacteroidales_Rikenellaceae		0.900965		0.505432		0.898097		0.014987		2.25309		1.31249		0.0899376		0.521902
	Bacteroidetes_Bacteroidia_Bacteroidales_Tannerellaceae		3.77569		2.19037		8.52265e-06		0.00395002		10.9922		10.625		1.99435e-06		2.79669e-07
	Firmicutes_Bacilli_Lactobacillales_Lactobacillaceae		1.63142		5.89994		0.155289		1.59281e-05		6.46668		30.9003		0.0129738		3.97311e-07
	Firmicutes_Clostridia_Clostridiales_Christensenellaceae		0.613876		0.374938		0.155289		0.0217207		2.42106		4.2549		0		0
	Firmicutes_Clostridia_Clostridiales_Lachnospiraceae		1.65702		1.57916		0.0447483		0.0369629		3.90268		5.79581		0.007235		9.31566e-05
	Firmicutes_Clostridia_Clostridiales_Peptococcaceae		0.20081		0.0772503		0.00277707		8.74499e-10		0.00112953		1.77322e-08		0.0218163		0.00010864
	Firmicutes_Clostridia_Clostridiales_Peptostreptococcaceae		0.114208		0.0275851		5.01658e-09		9.88017e-20		4.61326e-05		2.70507e-07		0.0129738		3.67927e-05
	Firmicutes_Clostridia_Clostridiales_Ruminococcaceae		0.676684		0.378027		0.0815805		2.90938e-06		1.72893		1.59431		0.220397		0.302204
	Proteobacteria_Alphaproteobacteria_Rhodospirillales_uncultured		132.542		34.6503		1.63776e-17		8.74499e-10		NA		NA		NA		NA
	Proteobacteria_Deltaproteobacteria_Desulfovibrionales_Desulfovibrionaceae		0.339121		0.360844		0.00375855		0.0205709		0.355539		0.0466963		0.640525		0.387866
	Proteobacteria_Gammaproteobacteria_Enterobacteriales_Enterobacteriaceae		18.499		8.75945		1.26925e-11		1.90269e-07		40.1922		43.3989		4.4425e-08		1.25352e-09
	Verrucomicrobia_Verrucomicrobiae_Verrucomicrobiales_Akkermansiaceae		0.106153		0.564359		4.62473e-05		0.367894		2.60631e-09		0.219914		1.51831e-05		0.510052
	Genus
	Actinobacteria_Actinobacteria_Bifidobacteriales_Bifidobacteriaceae_Bifidobacterium		152.498		435.215		8.98477e-17		4.42571e-28		2.39323e+07		2.07925e+08		1.29463e-05		1.00343e-06
	Actinobacteria_Coriobacteriia_Coriobacteriales_Atopobiaceae_uncultured		8.28135		3.35958		5.67427e-05		0.0143076		65593.1		7747.95		0.0095252		0.0284234
	Actinobacteria_Coriobacteriia_Coriobacteriales_Eggerthellaceae_uncultured		7.63884		1.44179		0.0013176		0.143369		NA		NA		NA		NA
	Bacteroidetes_Bacteroidia_Bacteroidales_Rikenellaceae_Alistipes		0.960584		0.46112		0.899408		0.0114783		2.25309		1.31249		0.0876916		0.5335
	Bacteroidetes_Bacteroidia_Bacteroidales_Tannerellaceae_Parabacteroides		4.04497		2.37		7.15309e-06		0.00263034		10.9922		10.625		2.085e-06		2.59894e-07
	Firmicutes_Bacilli_Lactobacillales_Lactobacillaceae_Lactobacillus		2.0235		6.43907		0.146008		2.6315e-05		6.46668		30.9003		0.0131117		3.6902e-07
	Firmicutes_Clostridia_Clostridiales_Christensenellaceae_uncultured		0.0898868		0.0249919		4.38943e-05		2.77871e-08		1.17677		0.546569		0		0
	Firmicutes_Clostridia_Clostridiales_Lachnospiraceae_A2		0.101324		0.130519		2.62621e-06		1.15394e-05		NA		NA		NA		NA
	Firmicutes_Clostridia_Clostridiales_Lachnospiraceae_Acetatifactor		0.0180677		0.0138042		4.14549e-05		3.42468e-06		3.42979e-05		4.42726e-06		0.0317147		0.00457843
	Firmicutes_Clostridia_Clostridiales_Lachnospiraceae_Anaerostipes		0.0428936		0.0551391		1.80146e-05		4.84355e-05		NA		NA		NA		NA
	Firmicutes_Clostridia_Clostridiales_Lachnospiraceae_Eisenbergiella		5656.99		4426.16		8.93351e-10		1.47535e-10		652773		5.92971e+07		0.0032288		0.000567789
	Firmicutes_Clostridia_Clostridiales_Lachnospiraceae_Eubacterium.fissicatena.group		0.00605365		0.00737665		8.98477e-17		7.55408e-17		NA		NA		NA		NA
	Firmicutes_Clostridia_Clostridiales_Lachnospiraceae_GCA.900066575		0.00208794		0.00671049		1.38822e-12		7.01859e-11		0.0831032		0.896863		0		0
	Firmicutes_Clostridia_Clostridiales_Lachnospiraceae_Lachnoclostridium		7.43051		4.32553		3.76475e-07		4.92834e-05		14.5204		12.2919		5.91828e-05		4.1594e-05
	Firmicutes_Clostridia_Clostridiales_Lachnospiraceae_Lachnospiraceae.NK4A136.group		0.00138871		0.00175439		5.22726e-18		3.51468e-18		NA		NA		NA		NA
	Firmicutes_Clostridia_Clostridiales_Lachnospiraceae_Lachnospiraceae_uncultured		0.139718		0.214626		0		0		1.81995e-08		8.0735e-10		2.72021e-05		1.52213e-10
	Firmicutes_Clostridia_Clostridiales_Lachnospiraceae_Marvinbryantia		0.0201523		0.0157115		0.00218125		0.000799121		NA		NA		NA		NA
	Firmicutes_Clostridia_Clostridiales_Lachnospiraceae_Tyzzerella		0.0317385		0.0434912		1.03443e-07		1.19058e-07		NA		NA		NA		NA
	Firmicutes_Clostridia_Clostridiales_Lachnospiraceae_uncultured		0.00268736		0.00214384		3.42627e-16		3.51468e-18		2.9925e-05		9.34033e-05		0.0462015		0.0150956
	Firmicutes_Clostridia_Clostridiales_Peptococcaceae_Peptococcus		0.0253442		0.022877		2.63943e-06		3.98621e-07		1.71213e-08		7.68667e-08		4.24823e-06		3.62524e-07
	Firmicutes_Clostridia_Clostridiales_Peptococcaceae_uncultured		0.209323		0.0348017		0.0427273		3.38179e-06		0.001065		1.95193e-08		0.0195515		0.000142752
	Firmicutes_Clostridia_Clostridiales_Peptostreptococcaceae_Romboutsia		0.0455376		0.00514236		0.000180436		9.77121e-11		4.99433e-07		1.65303e-09		6.20799e-06		5.30705e-07
	Firmicutes_Clostridia_Clostridiales_Ruminococcaceae_Anaerofilum		117.103		21.6458		1.87268e-16		6.10487e-08		4.68356e+08		5.34065e+06		2.46802e-07		5.63144e-06
	Firmicutes_Clostridia_Clostridiales_Ruminococcaceae_Anaerotruncus		0.104113		0.35077		0.00255351		0.112862		6.00844e-07		0.000453136		0.00596006		0.0301102
	Firmicutes_Clostridia_Clostridiales_Ruminococcaceae_Butyricicoccus		0.0603348		0.0738007		2.67448e-12		5.33584e-12		NA		NA		NA		NA
	Firmicutes_Clostridia_Clostridiales_Ruminococcaceae_Candidatus.Soleaferrea		3.52015		7.8734		0.00613708		1.48434e-06		119.705		6130.45		0.252622		0.0284234
	Firmicutes_Clostridia_Clostridiales_Ruminococcaceae_Eubacterium.coprostanoligenes.group		0.0662541		0.0188341		0.00204054		2.48965e-06		0.241336		0.153096		0		0
	Firmicutes_Clostridia_Clostridiales_Ruminococcaceae_Flavonifractor		437.943		282.264		1.64211e-14		2.67523e-16		NA		NA		NA		NA
	Firmicutes_Clostridia_Clostridiales_Ruminococcaceae_Fournierella		0.0202287		0.052028		0.0001557		0.00021328		NA		NA		NA		NA
	Firmicutes_Clostridia_Clostridiales_Ruminococcaceae_GCA.900066225		5.14354		1.79834		0.000324604		0.172721		121.847		1.90035		0.0192458		0.81547
	Firmicutes_Clostridia_Clostridiales_Ruminococcaceae_Harryflintia		0.158082		0.243057		0.000379861		0.00479265		NA		NA		NA		NA
	Firmicutes_Clostridia_Clostridiales_Ruminococcaceae_Intestinimonas		0.00570413		0.00504734		5.81021e-09		2.9645e-10		0.253328		0.547441		0		0
	Firmicutes_Clostridia_Clostridiales_Ruminococcaceae_Oscillibacter		0.0380695		0.0154865		5.67427e-05		5.12457e-08		1.8523e-05		7.45251e-10		0.0153151		6.49352e-10
	Firmicutes_Clostridia_Clostridiales_Ruminococcaceae_Ruminiclostridium		0.0590942		0.121641		1.69845e-06		8.23243e-05		4.46437e-06		0.000679975		0.00518119		0.0338269
	Firmicutes_Clostridia_Clostridiales_Ruminococcaceae_Ruminiclostridium.9		0.00134765		0.0026746		7.40691e-14		8.96137e-14		0.130668		0.277757		0		0
	Firmicutes_Clostridia_Clostridiales_Ruminococcaceae_Ruminococcaceae.NK4A214.group		0.122194		0.166345		1.76963e-05		3.04405e-05		NA		NA		NA		NA
	Firmicutes_Clostridia_Clostridiales_Ruminococcaceae_Ruminococcaceae.UCG.004		0.00299013		0.00497823		4.65081e-13		2.76652e-13		0.185762		0.247578		0		0
	Firmicutes_Clostridia_Clostridiales_Ruminococcaceae_Ruminococcaceae.UCG.005		0.03841		0.0487106		5.30428e-08		1.70516e-07		NA		NA		NA		NA
	Firmicutes_Clostridia_Clostridiales_Ruminococcaceae_Ruminococcaceae.UCG.009		0.0383339		0.0486445		6.00543e-11		2.35662e-10		NA		NA		NA		NA
	Firmicutes_Clostridia_Clostridiales_Ruminococcaceae_Ruminococcaceae.UCG.010		0.0344874		0.0426464		4.65081e-13		1.10119e-12		NA		NA		NA		NA
	Firmicutes_Clostridia_Clostridiales_Ruminococcaceae_Ruminococcaceae.UCG.014		0.0139971		0.0179367		8.98477e-17		6.13497e-17		NA		NA		NA		NA
	Firmicutes_Clostridia_Clostridiales_Ruminococcaceae_RuminococcaceaeX		0.260417		0.0886817		0.00152963		1.20528e-09		0.0392476		0.0810151		0.252622		0.24517
	Firmicutes_Clostridia_Clostridiales_Ruminococcaceae_Ruminococcus.1		0.0491526		0.0632081		5.15467e-06		1.47747e-05		NA		NA		NA		NA
	Firmicutes_Clostridia_Clostridiales_Ruminococcaceae_UBA1819		30.2585		7.77353		1.26699e-05		0.00427711		1.51448e+07		1.05072e+06		0.000102163		0.000939123
	Firmicutes_Clostridia_Clostridiales_Ruminococcaceae_uncultured		0.10735		0.137636		0.000686274		0.00226374		NA		NA		NA		NA
	Proteobacteria_Alphaproteobacteria_Rhodospirillales_Rhodospirillalesuncultured_uncultured		180.202		38.6426		2.0266e-13		4.15675e-08		NA		NA		NA		NA
	Proteobacteria_Deltaproteobacteria_Desulfovibrionales_Desulfovibrionaceae_Bilophila		0.241821		0.345641		0.00968159		0.0399298		0.355539		0.0466963		0.640525		0.358346
	Proteobacteria_Gammaproteobacteria_Enterobacteriales_Enterobacteriaceae_Escherichia.Shigella		19.0516		8.23695		3.08168e-11		3.0301e-07		40.1922		43.3989		4.64443e-08		1.00807e-09
	Verrucomicrobia_Verrucomicrobiae_Verrucomicrobiales_Akkermansiaceae_Akkermansia		0.059888		0.554379		0.000528186		0.44622		2.60631e-09		0.219914		1.58732e-05		0.508998
	NAs were produced when model assumptions were violated and no meaningful p-values could be calculated.
	Fold changes and p-values were compared to the control group.
	GXpoly = glucuronoxylan- and polyphenol-rich hemicellulose extract, pureGX = highly purified glucuronoxylan-rich hemicellulose extract

## Sheet: Table S3.
	Table S3. Relative abundance of bacteria in cecal samples of male Wistar rats fed either the control, GXpoly or pureGX diet when compared to females
	Control1 diet	model	male_p_FDR	Mean_female	Mean_male	FoldChange_male
	taxon
	Firmicutes_Clostridia_Clostridiales_Ruminococcaceae_Fournierella	MASS::glm.nb	0	0.145586	0.0590216	0.405407
	Firmicutes_Clostridia_Clostridiales_Ruminococcaceae_UBA1819	MASS::glm.nb	2.94053e-68	0.00146084	0.00651791	4.46175
	Firmicutes_Clostridia_Clostridiales_Ruminococcaceae_Eubacterium.coprostanoligenes.group	MASS::glm.nb	1.94336e-38	0.00416944	0.00772134	1.85189
	Actinobacteria_Coriobacteriia_Coriobacteriales_Eggerthellaceae_Enterorhabdus	MASS::glm.nb	2.05348e-09	0.000256438	0.000944829	3.68444
	Firmicutes_Clostridia_Clostridiales_Ruminococcaceae_GCA.900066225	MASS::glm.nb	0.000369142	0.000849348	0.00322637	3.79864
	Firmicutes_Clostridia_Clostridiales_Lachnospiraceae_Acetatifactor	MASS::glm.nb	0.000521601	0.0107547	0.00234279	0.217839
	Firmicutes_Erysipelotrichia_Erysipelotrichales_Erysipelotrichaceae_Turicibacter	MASS::glm.nb	0.003829	0.0004119	0.00186886	4.53717
	Firmicutes_Clostridia_Clostridiales_Lachnospiraceae_Eubacterium.fissicatena.group	MASS::glm.nb	0.0108149	0.00559746	0.0159454	2.84869
	Firmicutes_Clostridia_Clostridiales_Lachnospiraceae_Blautia	MASS::glm.nb	0.0438136	0.0294861	0.0874241	2.96493
	Firmicutes_Bacilli_Lactobacillales_Lactobacillaceae_Lactobacillus	MASS::glm.nb	0.0444855	0.000729117	0.00454576	6.23461
	Firmicutes_Clostridia_Clostridiales_Peptostreptococcaceae_Romboutsia	MASS::glm.nb	0.0558348	0.00870375	0.0197543	2.26963
	Actinobacteria_Coriobacteriia_Coriobacteriales_Atopobiaceae_Atopobiaceaeuncultured	MASS::glm.nb	0.0596335	2.97743e-05	0.000385068	12.9329
	Firmicutes_Clostridia_Clostridiales_Ruminococcaceae_Ruminococcaceaeuncultured	MASS::glm.nb	0.08363	0.00179467	0.00236357	1.31699
	Bacteroidetes_Bacteroidia_Bacteroidales_Rikenellaceae_Alistipes	MASS::glm.nb	0.0891002	0.0363735	0.0581323	1.59821
	Firmicutes_Clostridia_Clostridiales_Ruminococcaceae_Harryflintia	nlme::gls	0.0891002	0.00133741	0.000331229	0.247664
	Tenericutes_Mollicutes_Anaeroplasmatales_Anaeroplasmataceae_Anaeroplasma	MASS::glm.nb	0.0913105	0.0036441	0.000346958	0.0952109
	Firmicutes_Clostridia_Clostridiales_Ruminococcaceae_Ruminococcaceae.UCG.014	MASS::glm.nb	0.102423	0.00503427	0.00274857	0.545971
	Firmicutes_Clostridia_Clostridiales_Lachnospiraceae_Anaerostipes	log nlme::gls	0.117702	0.00806522	0.00260961	0.323564
	Firmicutes_Clostridia_Clostridiales_Ruminococcaceae_Butyricicoccus	MASS::glm.nb	0.139791	0.000625684	0.00105865	1.69199
	Firmicutes_Clostridia_Clostridiales_Ruminococcaceae_Ruminococcus.1	MASS::glm.nb	0.146071	0.00700334	0.0014229	0.203174
	Firmicutes_Clostridia_Clostridiales_Ruminococcaceae_Oscillibacter	MASS::glm.nb	0.146758	0.0163339	0.00908415	0.556154
	Proteobacteria_Alphaproteobacteria_Rhodospirillales_Rhodospirillalesuncultured_RhodospirillalesunculturedX	MASS::glm.nb	0.146758	0.000177712	3.24642e-05	0.182678
	Bacteroidetes_Bacteroidia_Bacteroidales_Bacteroidaceae_Bacteroides	MASS::glm.nb	0.154515	0.0198527	0.0126981	0.639618
	Firmicutes_Clostridia_Clostridiales_Christensenellaceae_Christensenellaceae.R.7.group	nlme::gls	0.154515	0.000316168	0.000788257	2.49315
	Firmicutes_Clostridia_Clostridiales_Lachnospiraceae_A2	nlme::gls	0.154515	0.000978704	0.000502944	0.513887
	Firmicutes_Clostridia_Clostridiales_Lachnospiraceae_Marvinbryantia	MASS::glm.nb	0.154515	0.000308731	0.0010888	3.52671
	Bacteroidetes_Bacteroidia_Bacteroidales_Muribaculaceae_MuribaculaceaeX	MASS::glm.nb	0.184067	0.0452835	0.0268545	0.593032
	Firmicutes_Clostridia_Clostridiales_Ruminococcaceae_Ruminococcaceae.UCG.004	MASS::glm.nb	0.184067	0.0103999	0.00661776	0.636332
	Firmicutes_Clostridia_Clostridiales_Ruminococcaceae_Ruminiclostridium	MASS::glm.nb	0.188233	0.0133652	0.00720781	0.539297
	Firmicutes_Clostridia_Clostridiales_Family.XIII_Eubacterium.nodatum.group	MASS::glm.nb	0.197825	0.000236685	0.000701277	2.96292
	Deferribacteres_Deferribacteres_Deferribacterales_Deferribacteraceae_Mucispirillum	MASS::glm.nb	0.219786	0.000440349	0.000124069	0.281751
	Firmicutes_Clostridia_Clostridiales_Ruminococcaceae_Intestinimonas	MASS::glm.nb	0.219786	0.00467352	0.00763503	1.63368
	Firmicutes_Bacilli_Lactobacillales_Streptococcaceae_Streptococcus	MASS::glm.nb	0.238914	0.000364128	0.00051003	1.40069
	Firmicutes_Clostridia_Clostridiales_Ruminococcaceae_Ruminococcaceae.UCG.010	MASS::glm.nb	0.238914	0.0011961	0.00194972	1.63006
	Firmicutes_Clostridia_Clostridiales_Ruminococcaceae_Ruminiclostridium.5	MASS::glm.nb	0.26909	0.00276029	0.00357248	1.29424
	Verrucomicrobia_Verrucomicrobiae_Verrucomicrobiales_Akkermansiaceae_Akkermansia	MASS::glm.nb	0.26909	0.0956236	0.145553	1.52214
	Bacteroidetes_Bacteroidia_Bacteroidales_Muribaculaceae_Muribaculaceaeuncultured.Bacteroidales.bacterium.Bacteroidales.bacterium	MASS::glm.nb	0.324119	0.0223918	0.0295821	1.32111
	Bacteroidetes_Bacteroidia_Bacteroidales_Muribaculaceae_Muribaculum	MASS::glm.nb	0.325206	0.00605331	0.00357552	0.590672
	Firmicutes_Clostridia_Clostridiales_Ruminococcaceae_RuminococcaceaeX	MASS::glm.nb	0.325206	0.0151794	0.011608	0.76472
	Bacteroidetes_Bacteroidia_Bacteroidales_Muribaculaceae_Muribaculaceaeuncultured.bacterium.bacterium	nlme::gls	0.331147	0.142638	0.113556	0.796114
	Bacteroidetes_Bacteroidia_Bacteroidales_Tannerellaceae_Parabacteroides	log nlme::gls	0.331147	0.00515079	0.0131899	2.56076
	Firmicutes_Bacilli_Lactobacillales_Streptococcaceae_Lactococcus	MASS::glm.nb	0.332045	0.000259365	0.000831475	3.20581
	Firmicutes_Erysipelotrichia_Erysipelotrichales_Erysipelotrichaceae_Erysipelatoclostridium	MASS::glm.nb	0.332045	0.000354929	0.000461821	1.30116
	Firmicutes_Clostridia_Clostridiales_Ruminococcaceae_Anaerotruncus	nlme::gls	0.397835	0.000281228	0.000463535	1.64825
	Firmicutes_Clostridia_Clostridiales_Lachnospiraceae_Lachnospiraceaeuncultured	MASS::glm.nb	0.39996	0.0181626	0.0145061	0.798678
	Firmicutes_Clostridia_Clostridiales_Christensenellaceae_Christensenellaceaeuncultured	MASS::glm.nb	0.412619	0.000756861	0.00111895	1.47841
	Firmicutes_Clostridia_Clostridiales_Ruminococcaceae_Ruminococcaceae.NK4A214.group	MASS::glm.nb	0.417585	0.000352584	0.000548833	1.5566
	Firmicutes_Clostridia_Clostridiales_Peptococcaceae_Peptococcus	nlme::gls	0.422279	0.00187313	0.0012705	0.678277
	Firmicutes_Clostridia_Clostridiales_Lachnospiraceae_Tyzzerella	MASS::glm.nb	0.500474	0.00237341	0.00174473	0.735113
	Firmicutes_Clostridia_Clostridiales_Peptococcaceae_Peptococcaceaeuncultured	nlme::gls	0.619909	0.0113057	0.00988808	0.874612
	Firmicutes_Clostridia_Clostridiales_Lachnospiraceae_LachnospiraceaeX	nlme::gls	0.650297	0.0228752	0.0202448	0.885009
	Firmicutes_Clostridia_Clostridiales_Lachnospiraceae_GCA.900066575	MASS::glm.nb	0.798612	0.00907095	0.0104147	1.14813
	Firmicutes_Clostridia_Clostridiales_Lachnospiraceae_Lachnoclostridium	MASS::glm.nb	0.818733	0.00458923	0.00562407	1.22549
	Firmicutes_Clostridia_Clostridiales_Ruminococcaceae_Candidatus.Soleaferrea	MASS::glm.nb	0.836346	0.000263862	0.000313241	1.18714
	Firmicutes_Clostridia_Clostridiales_Ruminococcaceae_Ruminiclostridium.9	MASS::glm.nb	0.836346	0.0181056	0.0164725	0.909799
	Firmicutes_Clostridia_Clostridiales_Lachnospiraceae_Lachnospiraceae.NK4A136.group	log nlme::gls	0.837624	0.0749508	0.0328119	0.43778
	Firmicutes_Clostridia_Clostridiales_Defluviitaleaceae_Defluviitaleaceae.UCG.011	MASS::glm.nb	0.857852	0.00175724	0.00153558	0.873858
	Actinobacteria_Actinobacteria_Bifidobacteriales_Bifidobacteriaceae_Bifidobacterium	log nlme::gls	0.938519	0.00039742	0.000236629	0.595413
	Firmicutes_Clostridia_Clostridiales_Ruminococcaceae_Ruminococcaceae.UCG.009	nlme::gls	0.943647	0.00142975	0.00151631	1.06054
	Proteobacteria_Deltaproteobacteria_Desulfovibrionales_Desulfovibrionaceae_Bilophila	MASS::glm.nb	0.943647	0.00950058	0.00986799	1.03867
	Patescibacteria_Saccharimonadia_Saccharimonadales_Saccharimonadaceae_Candidatus.Saccharimonas	MASS::glm.nb	0.946396	0.00229678	0.0021233	0.924467
	Proteobacteria_Gammaproteobacteria_Enterobacteriales_Enterobacteriaceae_Escherichia.Shigella	MASS::glm.nb	0.946396	0.00279943	0.002642	0.943762
	Actinobacteria_Actinobacteria_Micrococcales_Micrococcaceae_Rothia	MASS::glm.nb	0.968681	0.000810298	0.000779853	0.962428
	Firmicutes_Clostridia_Clostridiales_Clostridiaceae.1_Clostridium.sensu.stricto.1	MASS::glm.nb	0.9845	0.0015814	0.00161471	1.02106
	Firmicutes_Clostridia_Clostridiales_Ruminococcaceae_Ruminococcaceae.UCG.005	MASS::glm.nb	0.98822	0.00197473	0.0019647	0.994924
	GXpoly2 diet	model	male_p_FDR	Mean_female	Mean_male	FoldChange_male
	taxon
	Firmicutes_Clostridia_Clostridiales_Ruminococcaceae_Candidatus.Soleaferrea	MASS::glm.nb	7.15209e-06	0.00124822	0.000749011	0.600062
	Firmicutes_Bacilli_Lactobacillales_Lactobacillaceae_Lactobacillus	MASS::glm.nb	0.000411268	0.00692824	0.00102094	0.147358
	Firmicutes_Clostridia_Clostridiales_Ruminococcaceae_RuminococcaceaeX	MASS::glm.nb	0.0297725	0.0114605	0.000592386	0.0516894
	Bacteroidetes_Bacteroidia_Bacteroidales_Muribaculaceae_Muribaculaceaeuncultured.bacterium.bacterium	nlme::gls	0.25866	0.16693	0.070046	0.419614
	Firmicutes_Clostridia_Clostridiales_Peptococcaceae_Peptococcaceaeuncultured	MASS::glm.nb	0.25866	0.00227233	0.00228251	1.00448
	Proteobacteria_Deltaproteobacteria_Desulfovibrionales_Desulfovibrionaceae_Bilophila	MASS::glm.nb	0.25866	0.00539806	0.000533732	0.0988748
	Bacteroidetes_Bacteroidia_Bacteroidales_Bacteroidaceae_Bacteroides	MASS::glm.nb	0.375573	0.0450292	0.0148922	0.330723
	Firmicutes_Clostridia_Clostridiales_Christensenellaceae_Christensenellaceae.R.7.group	MASS::glm.nb	0.375573	0.00122549	0.00027929	0.2279
	Actinobacteria_Coriobacteriia_Coriobacteriales_Eggerthellaceae_Enterorhabdus	MASS::glm.nb	0.515761	0.00120143	0.00312024	2.5971
	Bacteroidetes_Bacteroidia_Bacteroidales_Muribaculaceae_MuribaculaceaeX	MASS::glm.nb	0.515761	0.13285	0.0739969	0.556995
	Bacteroidetes_Bacteroidia_Bacteroidales_Tannerellaceae_Parabacteroides	MASS::glm.nb	0.515761	0.0257933	0.0523129	2.02816
	Firmicutes_Clostridia_Clostridiales_Ruminococcaceae_Anaerofilum	nlme::gls	0.515761	0.0025389	0.00148039	0.583084
	Firmicutes_Clostridia_Clostridiales_Ruminococcaceae_Eubacterium.coprostanoligenes.group	MASS::glm.nb	0.515761	0.00043711	0.000382288	0.874582
	Firmicutes_Erysipelotrichia_Erysipelotrichales_Erysipelotrichaceae_Clostridium.innocuum.group	MASS::glm.nb	0.539347	0.00149059	0.0007837	0.525764
	Firmicutes_Clostridia_Clostridiales_Ruminococcaceae_GCA.900066225	nlme::gls	0.650189	0.0138936	0.00872613	0.628067
	Proteobacteria_Gammaproteobacteria_Enterobacteriales_Enterobacteriaceae_Escherichia.Shigella	MASS::glm.nb	0.700186	0.0646019	0.0346586	0.536495
	Firmicutes_Clostridia_Clostridiales_Ruminococcaceae_UBA1819	nlme::gls	0.706023	0.0775227	0.0594725	0.767163
	Actinobacteria_Actinobacteria_Bifidobacteriales_Bifidobacteriaceae_Bifidobacterium	MASS::glm.nb	0.741114	0.0362609	0.0644711	1.77798
	Firmicutes_Clostridia_Clostridiales_Ruminococcaceae_Flavonifractor	MASS::glm.nb	0.791973	0.0445095	0.0313885	0.705208
	Firmicutes_Clostridia_Clostridiales_Ruminococcaceae_Ruminiclostridium.5	MASS::glm.nb	0.864672	0.00767183	0.00469837	0.612418
	Firmicutes_Erysipelotrichia_Erysipelotrichales_Erysipelotrichaceae_Erysipelatoclostridium	nlme::gls	0.900597	0.000314528	0.000243035	0.772698
	Bacteroidetes_Bacteroidia_Bacteroidales_Rikenellaceae_Alistipes	nlme::gls	0.92569	0.0385393	0.0476155	1.2355
	Firmicutes_Clostridia_Clostridiales_Lachnospiraceae_Blautia	nlme::gls	0.92569	0.0519442	0.0464912	0.895023
	Proteobacteria_Alphaproteobacteria_Rhodospirillales_Rhodospirillalesuncultured_RhodospirillalesunculturedX	MASS::glm.nb	0.92569	0.0170603	0.0143145	0.839056
	Actinobacteria_Coriobacteriia_Coriobacteriales_Atopobiaceae_Atopobiaceaeuncultured	log nlme::gls	0.9837	0.00135912	0.000916118	0.67405
	Actinobacteria_Coriobacteriia_Coriobacteriales_Eggerthellaceae_Eggerthellaceaeuncultured	MASS::glm.nb	0.9837	0.000816734	0.00076844	0.94087
	Firmicutes_Clostridia_Clostridiales_Lachnospiraceae_Lachnoclostridium	nlme::gls	0.985041	0.0379794	0.0384405	1.01214
	Actinobacteria_Actinobacteria_Micrococcales_Micrococcaceae_Rothia	NA	NA	3.75164e-05	0.000197041	5.25213
	Bacteroidetes_Bacteroidia_Bacteroidales_Muribaculaceae_Muribaculum	NA	NA	0.00230648	0	0
	Deferribacteres_Deferribacteres_Deferribacterales_Deferribacteraceae_Mucispirillum	NA	NA	0.000832303	0	0
	Firmicutes_Bacilli_Lactobacillales_Streptococcaceae_Lactococcus	NA	NA	9.89495e-05	3.84926e-05	0.389013
	Firmicutes_Clostridia_Clostridiales_Christensenellaceae_Christensenellaceaeuncultured	NA	NA	0.000192583	3.55821e-05	0.184762
	Firmicutes_Clostridia_Clostridiales_Lachnospiraceae_Acetatifactor	NA	NA	0.101077	0	0
	Firmicutes_Clostridia_Clostridiales_Lachnospiraceae_Eisenbergiella	NA	NA	0.0173182	0.36333	20.9796
	Firmicutes_Clostridia_Clostridiales_Lachnospiraceae_LachnospiraceaeX	NA	NA	0.00331385	0.00209146	0.631128
	Firmicutes_Clostridia_Clostridiales_Peptostreptococcaceae_Clostridioides	NA	NA	0	0.00126004	Inf
	Firmicutes_Clostridia_Clostridiales_Peptostreptococcaceae_Romboutsia	NA	NA	0.000225098	0.00203777	9.05279
	Firmicutes_Clostridia_Clostridiales_Ruminococcaceae_Faecalibacterium	NA	NA	0.000272753	0.000145123	0.532068
	Firmicutes_Clostridia_Clostridiales_Ruminococcaceae_Oscillibacter	NA	NA	0.000904008	0.000331286	0.366464
	Firmicutes_Clostridia_Clostridiales_Ruminococcaceae_Ruminiclostridium	NA	NA	0.000559793	0.000526582	0.940672
	pureGX3 diet	model	male_p_FDR	Mean_female	Mean_male	FoldChange_male
	taxon
	Firmicutes_Clostridia_Clostridiales_Ruminococcaceae_GCA.900066225	glm	7.94311e-84	0.00747212	0.0016229	0.217194
	Firmicutes_Clostridia_Clostridiales_Ruminococcaceae_Ruminiclostridium.5	MASS::glm.nb	1.36837e-06	0.00726278	0.00116157	0.159934
	Firmicutes_Clostridia_Clostridiales_Lachnospiraceae_Blautia	MASS::glm.nb	6.16564e-05	0.0208269	0.116713	5.60395
	Deferribacteres_Deferribacteres_Deferribacterales_Deferribacteraceae_Mucispirillum	MASS::glm.nb	0.00164743	0.00106284	0.00049384	0.464642
	Firmicutes_Clostridia_Clostridiales_Ruminococcaceae_UBA1819	MASS::glm.nb	0.0373843	0.0083419	0.0568642	6.8167
	Firmicutes_Erysipelotrichia_Erysipelotrichales_Erysipelotrichaceae_Clostridium.innocuum.group	MASS::glm.nb	0.0559335	0.000123714	0.000932892	7.54074
	Proteobacteria_Gammaproteobacteria_Enterobacteriales_Enterobacteriaceae_Escherichia.Shigella	MASS::glm.nb	0.0559335	0.010695	0.0332155	3.10571
	Bacteroidetes_Bacteroidia_Bacteroidales_Muribaculaceae_Muribaculaceaeuncultured.bacterium.bacterium	MASS::glm.nb	0.0799647	0.0711827	0.120267	1.68955
	Firmicutes_Clostridia_Clostridiales_Ruminococcaceae_Anaerofilum	MASS::glm.nb	0.157708	0.000212087	0.000681446	3.21305
	Bacteroidetes_Bacteroidia_Bacteroidales_Rikenellaceae_Alistipes	MASS::glm.nb	0.212305	0.0130017	0.0316555	2.43472
	Firmicutes_Clostridia_Clostridiales_Lachnospiraceae_LachnospiraceaeX	log nlme::gls	0.353689	0.00959715	0.00172723	0.179974
	Firmicutes_Bacilli_Lactobacillales_Streptococcaceae_Lactococcus	MASS::glm.nb	0.368908	0.000793501	0.000221524	0.279172
	Firmicutes_Clostridia_Clostridiales_Lachnospiraceae_Eisenbergiella	log nlme::gls	0.368908	0.167547	0.15002	0.895393
	Firmicutes_Clostridia_Clostridiales_Ruminococcaceae_Flavonifractor	nlme::gls	0.368908	0.0136815	0.0291531	2.13084
	Firmicutes_Clostridia_Clostridiales_Ruminococcaceae_RuminococcaceaeX	MASS::glm.nb	0.368908	0.00146901	0.000919862	0.62618
	Proteobacteria_Alphaproteobacteria_Rhodospirillales_Rhodospirillalesuncultured_RhodospirillalesunculturedX	MASS::glm.nb	0.443196	0.00623973	0.00172977	0.277219
	Bacteroidetes_Bacteroidia_Bacteroidales_Muribaculaceae_Muribaculaceaeuncultured.Bacteroidales.bacterium.Bacteroidales.bacterium	MASS::glm.nb	0.607105	0.0136106	0.00849397	0.62407
	Actinobacteria_Coriobacteriia_Coriobacteriales_Atopobiaceae_Atopobiaceaeuncultured	MASS::glm.nb	0.717326	0.000433553	0.000686578	1.58361
	Bacteroidetes_Bacteroidia_Bacteroidales_Muribaculaceae_MuribaculaceaeX	MASS::glm.nb	0.717326	0.108445	0.145436	1.3411
	Bacteroidetes_Bacteroidia_Bacteroidales_Muribaculaceae_Muribaculum	MASS::glm.nb	0.717326	0.00193281	0.00126561	0.6548
	Firmicutes_Clostridia_Clostridiales_Christensenellaceae_Christensenellaceae.R.7.group	MASS::glm.nb	0.717326	0.000688778	0.00041604	0.604026
	Firmicutes_Clostridia_Clostridiales_Lachnospiraceae_Lachnoclostridium	MASS::glm.nb	0.717326	0.0267682	0.0188981	0.70599
	Firmicutes_Clostridia_Clostridiales_Ruminococcaceae_Candidatus.Soleaferrea	MASS::glm.nb	0.717326	0.00188786	0.00262969	1.39295
	Proteobacteria_Deltaproteobacteria_Desulfovibrionales_Desulfovibrionaceae_Bilophila	log nlme::gls	0.717326	0.00462507	0.00259941	0.562027
	Firmicutes_Clostridia_Clostridiales_Ruminococcaceae_Ruminiclostridium	MASS::glm.nb	0.815084	0.00125555	0.000970625	0.773066
	Actinobacteria_Actinobacteria_Bifidobacteriales_Bifidobacteriaceae_Bifidobacterium	MASS::glm.nb	0.881651	0.151877	0.131364	0.864935
	Bacteroidetes_Bacteroidia_Bacteroidales_Tannerellaceae_Parabacteroides	MASS::glm.nb	0.881651	0.0209483	0.0194709	0.929476
	Firmicutes_Bacilli_Lactobacillales_Lactobacillaceae_Lactobacillus	MASS::glm.nb	0.881651	0.0164099	0.0149542	0.911296
	Actinobacteria_Actinobacteria_Micrococcales_Micrococcaceae_Rothia	MASS::glm.nb	0.91587	0.000206496	0.00018329	0.88762
	Verrucomicrobia_Verrucomicrobiae_Verrucomicrobiales_Akkermansiaceae_Akkermansia	MASS::glm.nb	0.91587	0.0621302	0.072287	1.16348
	Bacteroidetes_Bacteroidia_Bacteroidales_Bacteroidaceae_Bacteroides	MASS::glm.nb	0.994419	0.0119913	0.0119133	0.993498
	Firmicutes_Clostridia_Clostridiales_Lachnospiraceae_Acetatifactor	NA	NA	0.09531	0	0
	Firmicutes_Clostridia_Clostridiales_Ruminococcaceae_Anaerotruncus	NA	NA	0.000186397	0.000101759	0.545929
	Firmicutes_Erysipelotrichia_Erysipelotrichales_Erysipelotrichaceae_Erysipelatoclostridium	NA	NA	0.000479857	5.74313e-05	0.119684
	1Cellulose
	2Glucuronoxylan- and polyphenol-rich hemicellulose extract
	3 Highly purified glucuronoxylan-rich hemicellulose extract

## Sheet: Table S4.
	Table S4. Predicted functions in cecal microbiota from Wistar rats in the GXpoly or pureGX groups when compared to the control (cellulose) group
	Predicted function	FoldChange_GXpoly	FoldChange_pureGX	GXpoly_FDR.p	pureGX_FDR.p
	Porphyrin and chlorophyll metabolism	1.26065	1.12358	0.059331	0.326706
	ABC transporters	1.16415	1.12169	0.0902941	0.299198
	Bacterial toxins	0.928505	0.976895	0.0902941	0.614592
	Chaperones and folding catalysts	0.910451	0.959178	0.0902941	0.355906
	Lipopolysaccharide biosynthesis	0.457576	0.964357	0.0902941	0.868407
	Lipopolysaccharide biosynthesis proteins	0.834646	0.961237	0.0902941	0.715168
	Pores ion channels	0.818679	0.968504	0.0902941	0.784379
	Protein kinases	1.19578	1.08718	0.0902941	0.370739
	Transcription factors	1.12799	1.05454	0.0902941	0.39807
	Transporters	1.11048	1.07409	0.0902941	0.299198
	FDR-p < 0.1 was used as the significant threshold due to small sample size.
	Fold changes and p-values were compared to the control group.
	GXpoly = glucuronoxylan- and polyphenol-rich hemicellulose extract, pureGX = highly purified glucuronoxylan-rich hemicellulose extract

## Sheet: Table S5.
	Table S5. Analyses of fecal and cecal samples of Wistar rats fed either control (cellulose), GXpoly or pureGX diet.
		Total				Male			Female
		Control	GXpoly	pureGX	p-value	Control	GXpoly	pureGX	Control	GXpoly	pureGX
	Weight gain (g)	115.6 ± 45.2	116.4 ± 45.2	111.3 ± 40.2	0.661	156.6 ± 20.2	157.6 ± 18.8	147.8 ± 18.5	74.7 ± 10.3	75.2 ± 10.7	74.8 ± 6.5
	Food intake (g)	17.2 ± 2.9	15.5 ± 5.1	15.1 ± 4.7	0.318	18.5 ± 2.9	18.9 ± 4.9	14.8 ± 3.6	16.0 ± 2.5	12.2 ± 2.4	15.3 ± 5.9
	Water intake (mL)	32.9 ± 12.0	33.4 ± 10.7	25.0 ± 11.6	0.226	41.4 ± 10.7	40.0 ± 10.0	27.1 ± 9.5	24.3 ± 5.3	26.7 ± 6.8	22.8 ± 13.8
	Urine volume (mL)	11.5 ± 2.2	11.3 ± 2.4	9.6 ± 3.3	0.100	13.3 ± 0.6	12.2 ± 2.2	9.9 ± 2.7	9.8 ± 1.6	10.4 ± 2.5	9.3 ± 4.0
	Fecal weight (g)	3.2 ± 1.1a	2.2 ± 2.8a	1.3 ± 1.1b	0.031	3.4 ± 1.3	2.8 ± 3.9	1.1 ± 0.9	3.1 ± 1.1	1.5 ± 0.9	1.4 ± 1.3
	Dry-matter content % (n=18)	29.1 ± 9.0	23.3 ± 5.8	21.4 ± 4.5	0.176	74.8 ± 2.5	77.8 ± 2.0	79.5 ± 2.4	67.1 ± 12.3	75.6 ± 8.8	77.8 ± 6.6
	NOCs (µmol/g) (n=36)
	ATNC	0.30 ± 0.06a	0.51 ± 0.23b	0.55 ± 0.27b	0.001	0.30 ± 0.07	0.40 ± 0.10	0.37 ± 0.04	0.29 ± 0.03	0.61 ± 0.28	0.68 ± 0.29
	FeNO	0.08 ± 0.06a	0.24 ± 0.18b	0.30 ± 0.23b	<0.001	0.08 ± 0.07	0.16 ± 0.06	0.12 ± 0.03	0.08 ± 0.05	0.32 ± 0.23	0.43 ± 0.21
	RSNO	0.01 ± 0.02a	0.03 ± 0.04a	0.04 ± 0.05a	0.226	0.01 ± 0.02	0.02 ± 0.03	0.02 ± 0.02	0.02 ± 0.03	0.04 ± 0.04	0.05 ± 0.07
	SCFAs cecum (µmol/g dry content) (n=42)
	Acetic	119.9 ± 38.3a	191.5 ± 61.4b	237.8 ± 86.8b	<0.001	103.12 ± 20.41	156.16 ± 29.96	197.38 ± 65.80	136.71 ± 45.93	226.82 ± 66.10	278.24 ± 90.41
	Propionic	32.7 ± 6.5	34.7 ± 7.2	39.5 ± 8.4	0.055	34.70 ± 6.46	31.97 ± 7.62	36.98 ± 8.95	30.68 ± 6.26	37.51 ± 5.99	41.99 ± 7.79
	Butyric	33.6 ± 8.9	37.7 ± 23.8	42.4 ± 23.4	0.499	32.23 ± 5.85	42.49 ± 25.23	30.70 ± 17.98	34.99 ± 11.53	32.88 ± 23.19	54.08 ± 24.61
	Branched-chain fatty acics (isobutyric and isovaleric)	8.3 ± 1.1a	6.3 ± 0.9b	5.4 ± 1.3b	<0.001	8.78 ± 1.20	6.76 ± 0.98	5.59 ± 0.49	7.88 ± 0.78	5.87 ± 0.44	5.29 ± 1.87
	Total SCFAs	194.5 ± 47.5a	281.9 ± 91.6b	313.5 ± 92.0b	<0.001	178.82 ± 30.38	237.39 ± 50.59	270.65 ± 69.64	210.26 ± 58.24	303.08 ± 82.08	379.60 ± 102.86
	SCFAs colon (µmol/g) (n=32)
	Acetic	45.3 ± 10.9	61.8 ± 30.2	70.8 ± 36.8	0.149	45.48 ± 11.71	61.01 ± 31.93	80.91 ± 47.08	44.99 ± 10.92	63.05 ± 32.22	60.74 ± 22.81
	Propionic	19.4 ± 4.4	20.4 ± 4.6	25.4 ± 8.3	0.108	19.52 ± 5.40	19.86 ± 3.79	26.37 ± 8.61	19.12 ± 1.22	21.10 ± 6.10	24.34 ± 8.75
	Butyric	13.6 ± 2.1	17.6 ± 8.9	18.5 ± 11.7	0.554	14.24 ± 2.23	21.13 ± 9.64	20.42 ± 13.41	12.12 ± 0.84	12.32 ± 4.34	16.67 ± 10.66
	Branched-chain fatty acics (isobutyric and isovaleric)	7.1 ± 1.6	7.5 ± 1.8	5.3 ± 2.9	0.100	7.82 ± 0.96	8.47 ± 0.80	5.90 ± 3.17	5.43 ± 1.77	6.09 ± 1.94	4.78 ± 2.82
	Total SCFAs	85.4 ± 17.1	107.3 ± 40.0	120.1 ± 51.3	0.187	87.06 ± 19.66	110.48 ± 42.26	133.60 ± 62.90	81.66 ± 11.24	102.56 ± 42.22	106.53 ± 37.22
	Statistically significant difference in group means labeled with different letters.
	GXpoly = glucuronoxylan- and polyphenol-rich hemicellulose extract, pureGX = highly purified glucuronoxylan-rich hemicellulose extract
	ATNC = apparent total N-nitroso compounds, FeNO = nitrosyl iron, RSNO = nitroso thiols, SCFA = short-chain fatty acids, BCFA = branched-chain fatty acids

## Sheet: Table S6.
	Table S6. Total N-nitroso compound excretion (nmol/24h) in control (cellulose) GXpoly and pureGX groups.
		Control	GXpoly	pureGX	p-value
	ATNC	1.03 ± 0.46	1.12 ± 1.21	0.81 ± 0.84	0.302
	FeNO	0.30 ± 0.27	0.53 ± 0.56	0.44 ± 0.58	0.528
	RSNO	0.05 ± 0.09	0.07 ± 0.10	0.06 ± 0.13	0.930
	ATNC = apparent total N-nitroso compounds, FeNO = nitrosyl iron, RSNO = nitroso thiols
	GXpoly = glucuronoxylan- and polyphenol-rich hemicellulose extract, pureGX = highly purified glucuronoxylan-rich hemicellulose extract
